# Supplementary material
Source: MDPI journal article supplement (https://www.mdpi.com/2221-3759/5/4/18)
Supplement: s1 [file s1]

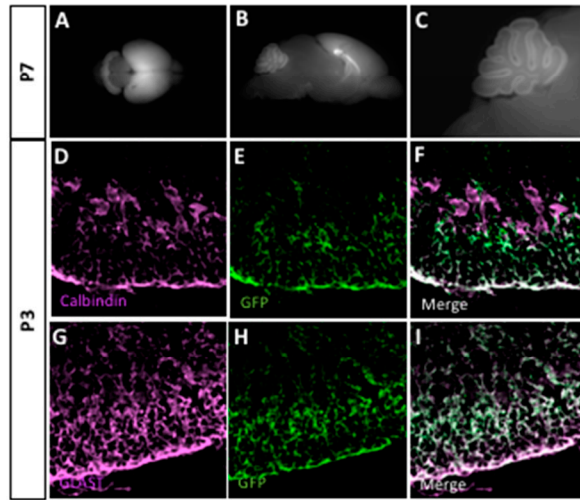

**Figure S1: GFAP-Cre recombination occurs in the Bergmann glia of the cerebellum.** (A,B) GFAP-Cre: *ROSA<sup>dTom/EGFP</sup>* GFP expression indicating Cre recombination appears in the cerebral cortex, hippocampus and cerebellum at P7. (D-H) Immunohistochemistry at P3 shows that the Purkinje cell marker Calbindin does not co-localize with GFP staining (marking Cre activity, D,G) while the astrocyte marker GLAST does strongly co-localize with GFP (E,H).

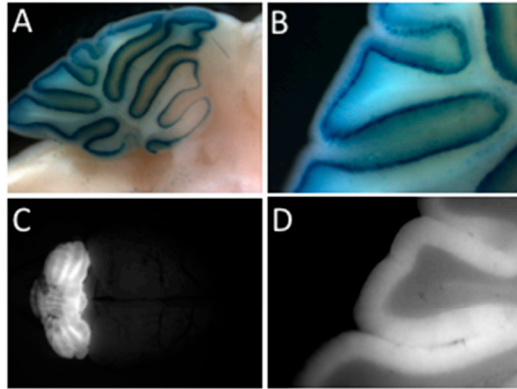

**Figure S2: Pcp2-Cre recombination occurs in the Purkinje cells of the cerebellum.** (A,B) Staining in a *Pcp2-Cre;ROSA<sup>lacZ</sup>* cerebellum shows strong recombination in the Purkinje cell layer of the cerebellum at P10. (C,D) *Pcp2-Cre: ROSA<sup>dTom/EGFP</sup>* GFP fluorescence shows this signal is present in the cerebellum at 1 month of age.
